# Supplementary material for: Dye-sensitized solar cells based on a 1D/3D double-layered ZnO photoanode with improved photovoltaic performance
Source: Royal Society of Chemistry journal article supplement (doi:10.1039/c5ra11257e), 2015-01-01
Supplement: c5ra11257e1.pdf [file c5ra11257e1.pdf]

## Electronic Supplementary Information (ESI)

### **Dye-sensitized solar cells based on a 1D/3D double-layered ZnO photoanode with improved photovoltaic performance**

Yu-Fen Wang<sup>a,b</sup>, Xin Wang<sup>a</sup>, Xi-Fei Li<sup>\*a</sup> and De-Jun Li<sup>\*a</sup>

<sup>a</sup>Energy & Materials Engineering Centre, College of Physics and Materials Science, Tianjin Normal University, Tianjin 300387, China. E-mail: [xfli@mail.tjnu.edu.cn](mailto:xfli@mail.tjnu.edu.cn); [dejunli@mail.tjnu.edu.cn](mailto:dejunli@mail.tjnu.edu.cn)

<sup>b</sup>Key Laboratory of Advanced Energy Materials Chemistry (Ministry of Education), Collaborative Innovation Center of Chemical Science and Engineering, College of Chemistry, Nankai University, Tianjin 300071, China

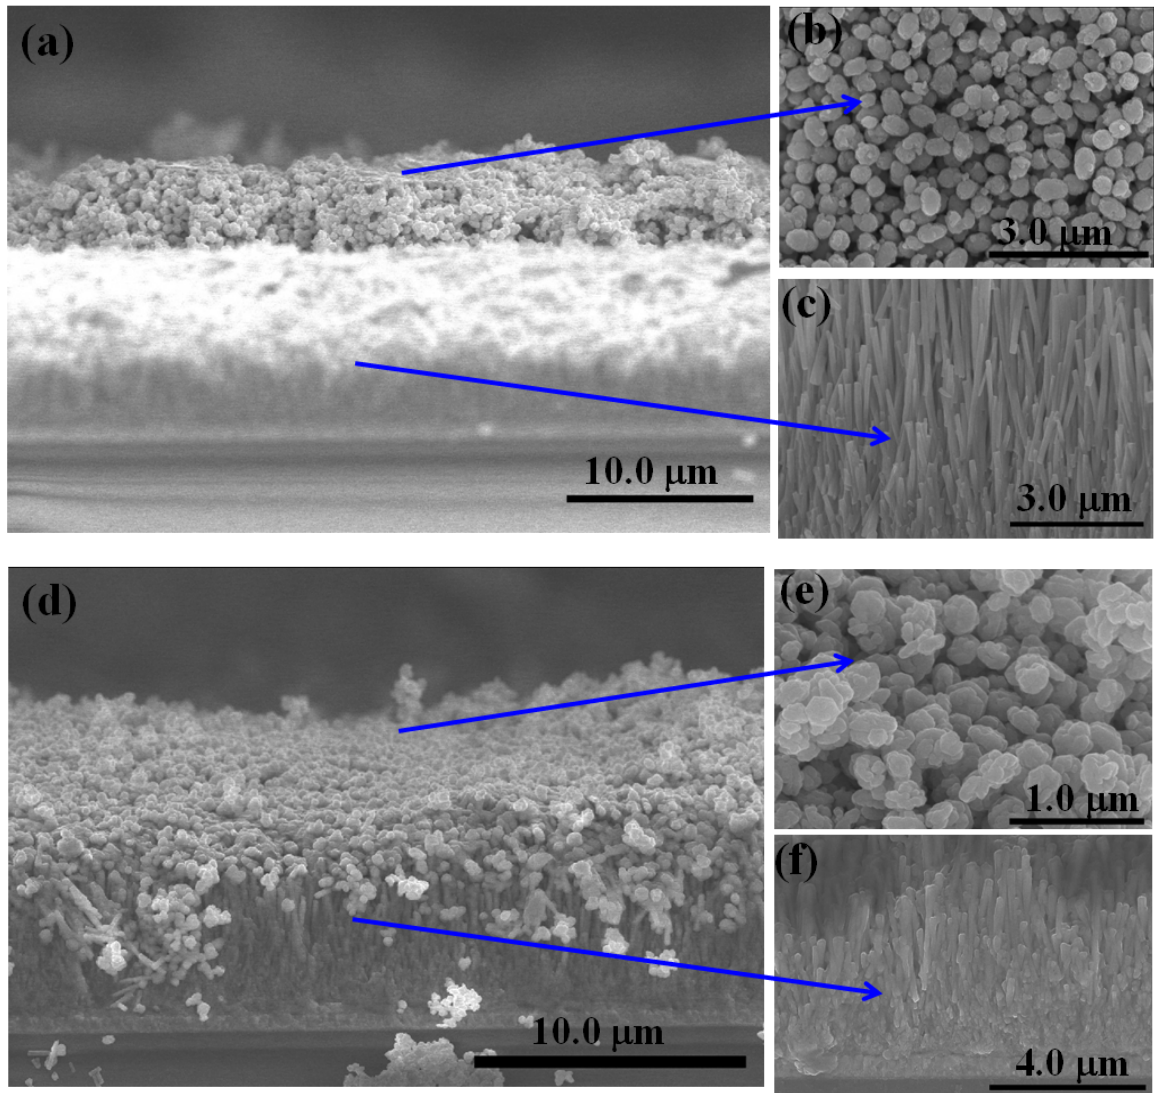

**Fig. S1** (a, d) Cross-sectional SEM image view of double-layer ZnO photoanodes; FE- SEM images the each layer of ZnO structures: (c, f) ZnO nanorods; (b) ZnO ellipsoids; (e) ZnO spheres.

Fig. S1 shows the cross-sectional FE-SEM image of ZnO NRs+ellipsoids and ZnO NRs+spheres double layered photoanode film. There is no obvious gap between ZnO ellipsoids or spheres top layer and nanorods active layer, indicating the connectivity between ZnO ellipsoids or spheres and nanorods is quite good, which is suitable for the efficient charge transport from ZnO ellipsoids or spheres to nanorods.

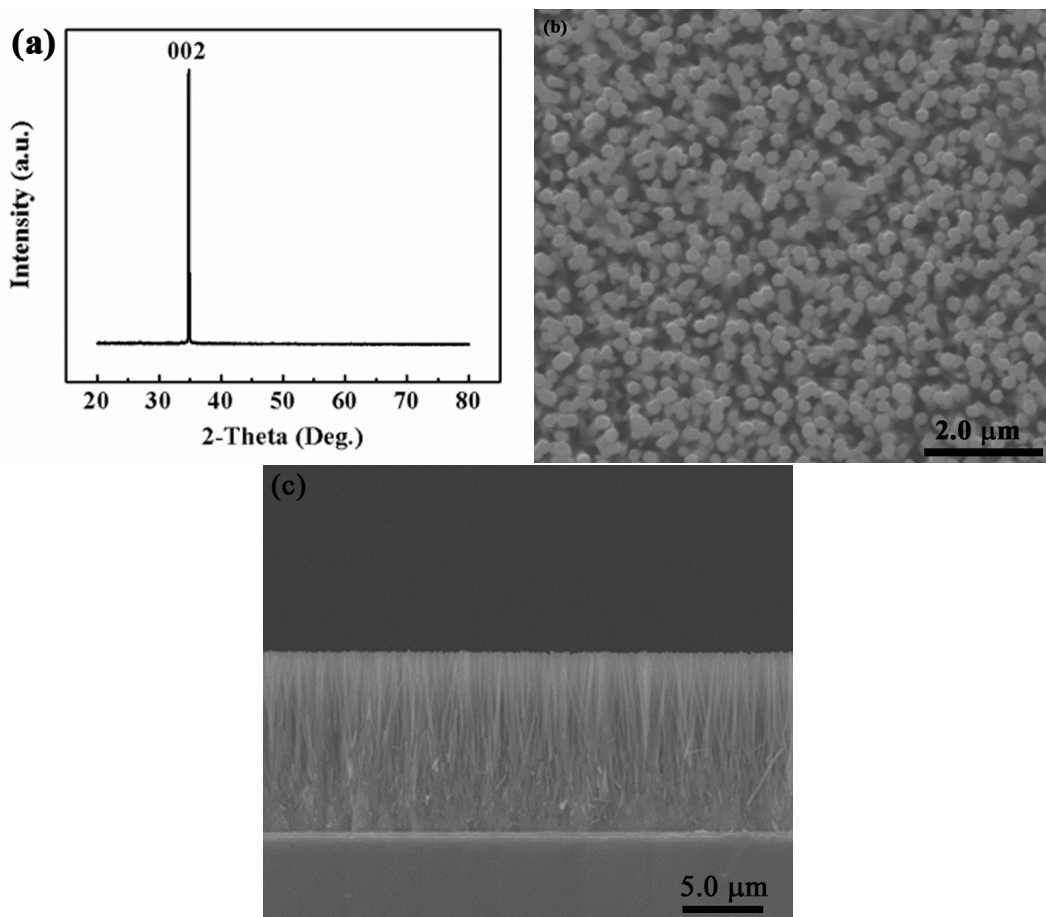

**Fig. S2** (a) XRD; (b) Top-view SEM image and (c) Cross-sectional SEM image of ZnO nanoarrays.

Fig. S2a shows the typical XRD patterns of as-synthesized ZnO nanoarrays samples. The diffraction peaks of the as-prepared sample are consistent with the hexagonal structure of ZnO (JCPDS Card No. 65-3411) with cell constants of  $a=b=3.25 \text{ \AA}$  and  $c = 5.207 \text{ \AA}$ , and the stronger peaks of the XRD patterns indicates high crystallinity of the as-prepared ZnO. The morphology of the as-prepared ZnO products are characterized by FE-SEM, shown in Fig. S2b and S2c. The ZnO nanoarrays are  $\sim 10 \text{ \mu m}$  in length.

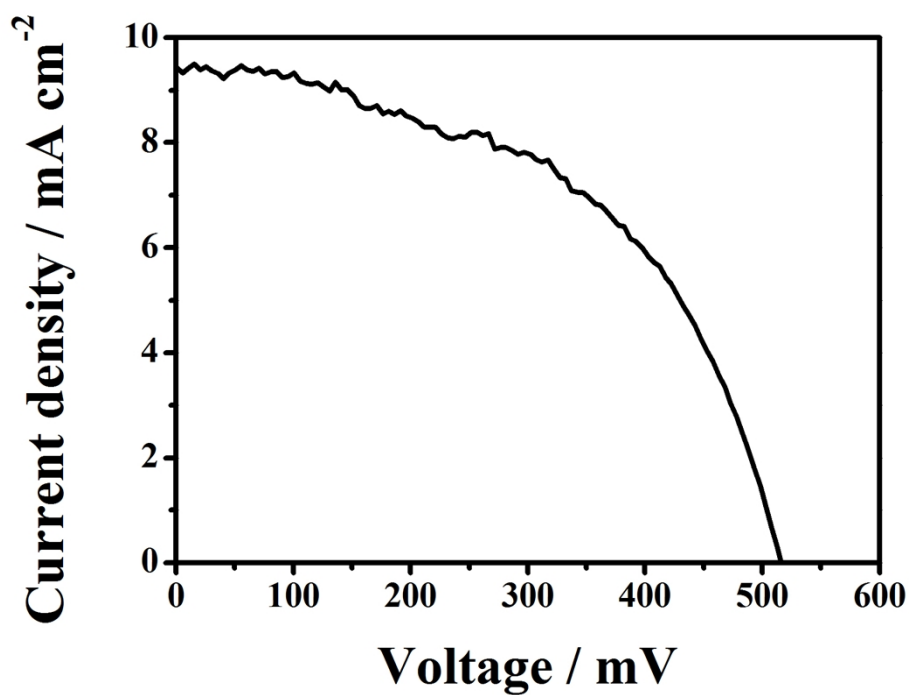

**Fig. S3.** Photocurrent density-voltage ( $J$ - $V$ ) for DSSCs based on ZnO NRs+9 $\mu$ m ellipsoids (with the same amount of N719 dye molecules

to ZnO NRs+5 $\mu$ m spheres).

**Table S1.** Detailed photovoltaic parameters ( $J_{sc}$ ,  $V_{oc}$ , FF, and PCE) of DSSCs with different ZnO photoanodes.

| DSSCs                         | $J_{sc}$ /<br>mA cm <sup>-2</sup> | $V_{oc}$ /<br>mV | $\eta$ /% | FF   | Adsorbed dye/<br>$\times 10^{-8}$ mol cm <sup>-2</sup> |
|-------------------------------|-----------------------------------|------------------|-----------|------|--------------------------------------------------------|
| ZnO NRs +5 $\mu$ m ellipsoids | 7.41                              | 588              | 2.26      | 0.52 | 2.26                                                   |
| ZnO NRs+9 $\mu$ m ellipsoids  | 9.38                              | 516              | 2.47      | 0.51 | 3.19                                                   |
| ZnO NRs+5 $\mu$ m spheres     | 10.66                             | 555              | 3.19      | 0.54 | 3.20                                                   |

**Table S2.** Detailed IMPS and IMVS parameters ( $\tau_d$ ,  $\tau_r$ ,  $\eta_{cc}$ ,  $D_n$ , and  $L_n$ ) of DSSCs based on different ZnO photoanodes (Light intensity: 150 W/m<sup>2</sup>).

| DSSCs              | $\tau_d$ (ms) | $\tau_r$ (ms) | $\eta_{cc}/\%$ | $D_n$ (cm <sup>2</sup> /s) | $L_n$ ( $\mu$ m) |
|--------------------|---------------|---------------|----------------|----------------------------|------------------|
| ZnO NRs+ellipsoids | 1.19          | 37.04         | 96.78          | $4.71 \times 10^{-4}$      | 41.80            |
| ZnO NRs+spheres    | 1.88          | 24.05         | 92.18          | $2.99 \times 10^{-4}$      | 26.80            |

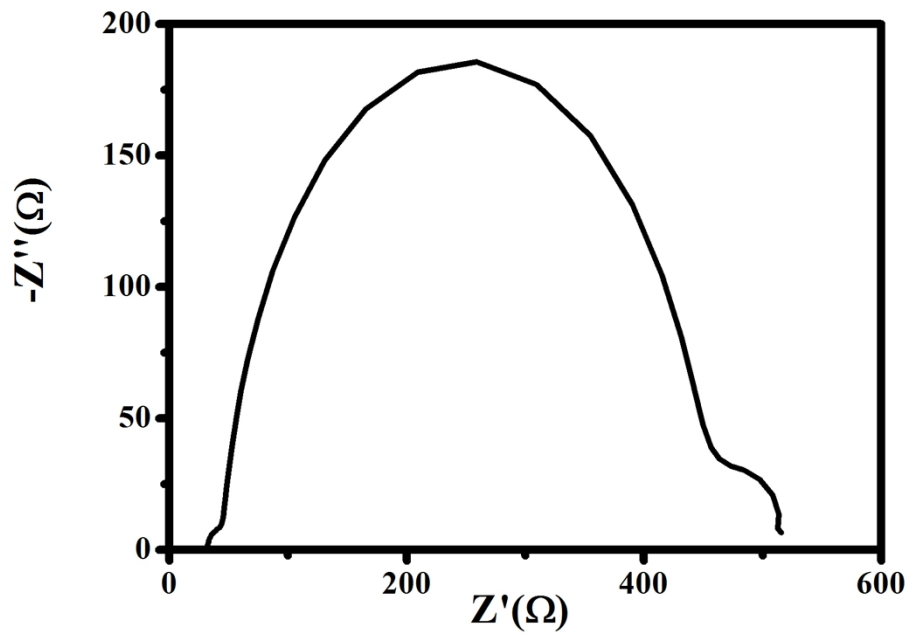

**Fig. S4** Impedance spectra (Nyquist plots) of DSSCs based on ZnO NRs measured in the dark at 0.6 V bias.
